# Supplementary material for: Magnetic liposomes for light-sensitive drug delivery and combined photothermal–chemotherapy of tumors
Source: Royal Society of Chemistry journal article supplement (doi:10.1039/c8tb02684j), 2019-01-01
Supplement: c8tb02684j1.pdf [file c8tb02684j1.pdf]

Supporting information

**Magnetic liposomes for light sensitive drug delivery and  
combined photothermal-chemotherapy of tumor**

Song Shen,<sup>a,\*†</sup> Danhuang Huang,<sup>a†</sup> Jin Cao,<sup>a</sup> Ying Chen,<sup>b</sup> Xin Zhang,<sup>b</sup> Shujun Guo,<sup>d</sup>  
Wanjun Ma,<sup>c</sup> Xueyong Qi,<sup>a</sup> Yanru Ge,<sup>a,\*</sup> and Lin Wu<sup>b\*</sup>

<sup>a</sup> *College of Pharmaceutical Sciences, Jiangsu University, Zhenjiang, Jiangsu 212013, China*

<sup>b</sup> *Affiliated Hospital of Jiangsu University, Zhenjiang 212001, China*

<sup>c</sup> *Health Center of Maoshan, Ningbo, Zhejiang 315191, China*

<sup>d</sup> *College of Life Science, Henan Normal University*

\*Corresponding Authors: jsdx.shensong@163.com (S. Shen),  
linmeimei1983@163.com (L. Wu), and geyanru@ujs.edu.cn (Y. Ge)

† These authors contributed equally to this work.

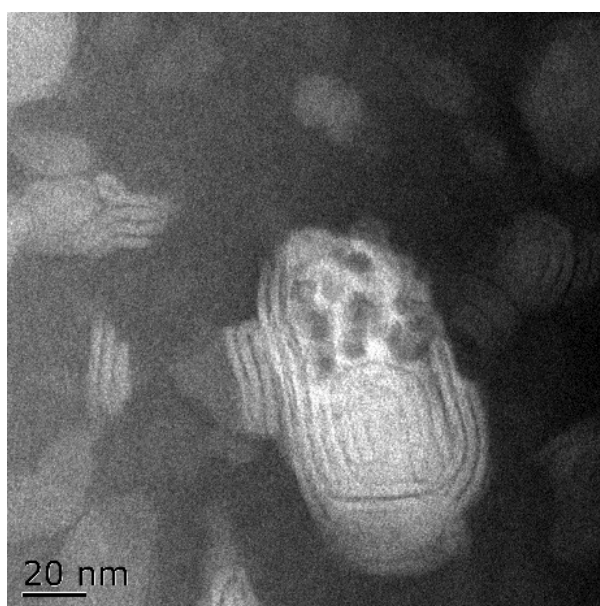

Figure S1. TEM images of  $\text{Fe}_3\text{O}_4$ -TSL showing the encapsulation of magnetic aggregates in the liposomes.

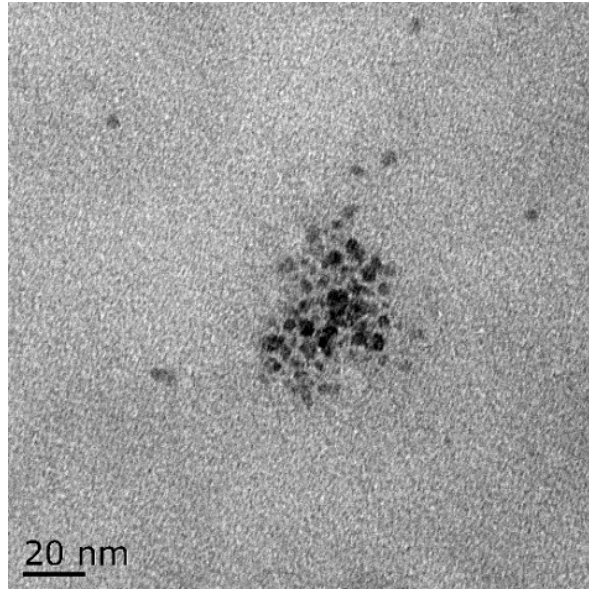

Figure S2. TEM images showing the formation of Fe<sub>3</sub>O<sub>4</sub> magnetic aggregates.
